# Supplementary material for: Electronic origin of negative thermal expansion in V2OPO4
Source: Royal Society of Chemistry journal article supplement (doi:10.1039/d0cc01920h), 2020-01-01
Supplement: d0cc01920h1.pdf [file d0cc01920h1.pdf]

Supplementary Information for

### Electronic origin of negative thermal expansion in $V_2OPO_4$

Elise Pachoud,<sup>a</sup> James Cumby,<sup>a</sup> Jon Wright,<sup>b</sup> Branimir Raguž,<sup>c</sup> Robert Glaum<sup>c</sup> and J. Paul Attfield<sup>\*a</sup>

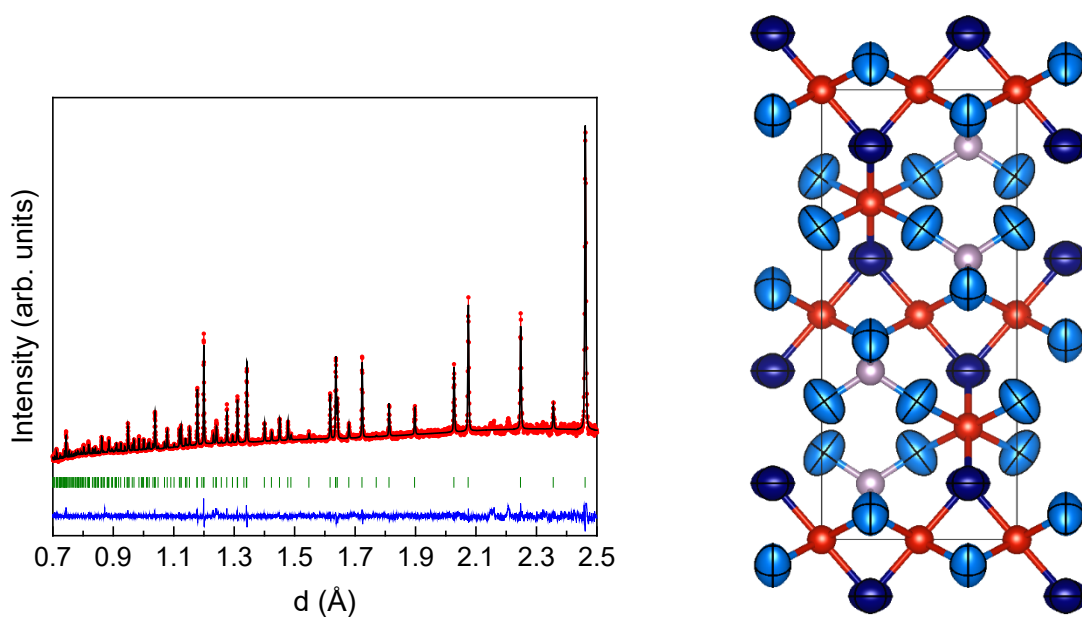

**Fig. SI-1.** Fitted 773 K neutron powder data and the refined tetragonal  $I4_1/amd$  structure showing the anisotropic thermal ellipsoids for the oxygens (O1/O2 = light/dark blue).

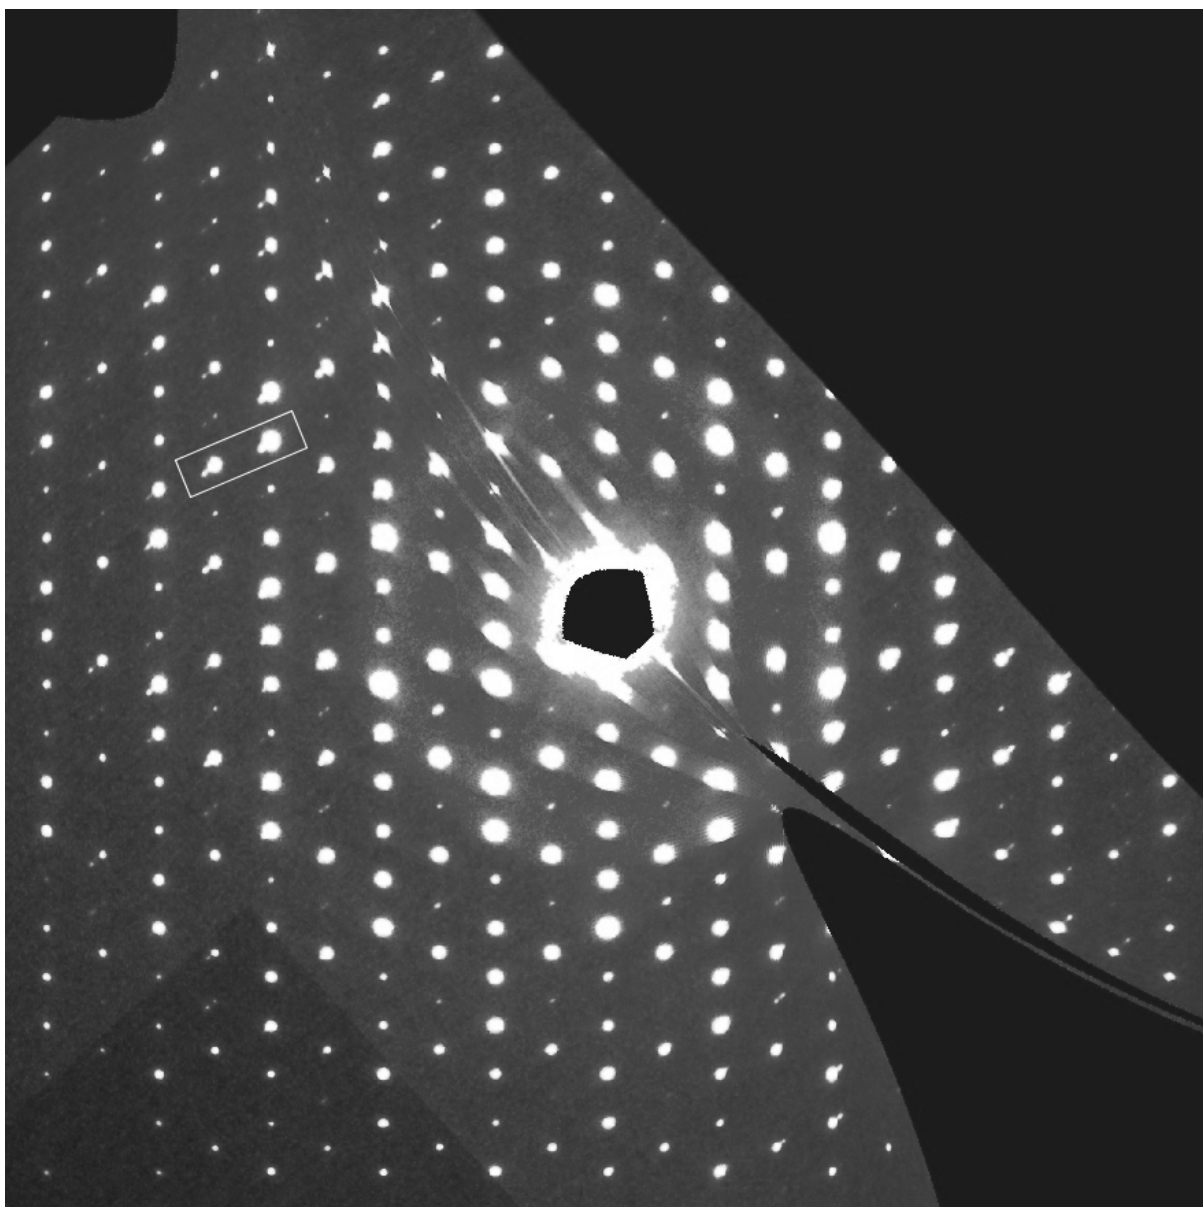

**Fig. SI-2.** (a) Tetragonal ( $h -1 l$ ) precession images from high-resolution single crystal x-ray diffraction at 623 K integrated over  $(0 -0.8 0)$  and  $(0 -1.2 0)$ . The highlighted area corresponds to the  $(-7 -1 6)$  and  $(-6 -1 7)$  reflections as shown in Fig. 4(a).

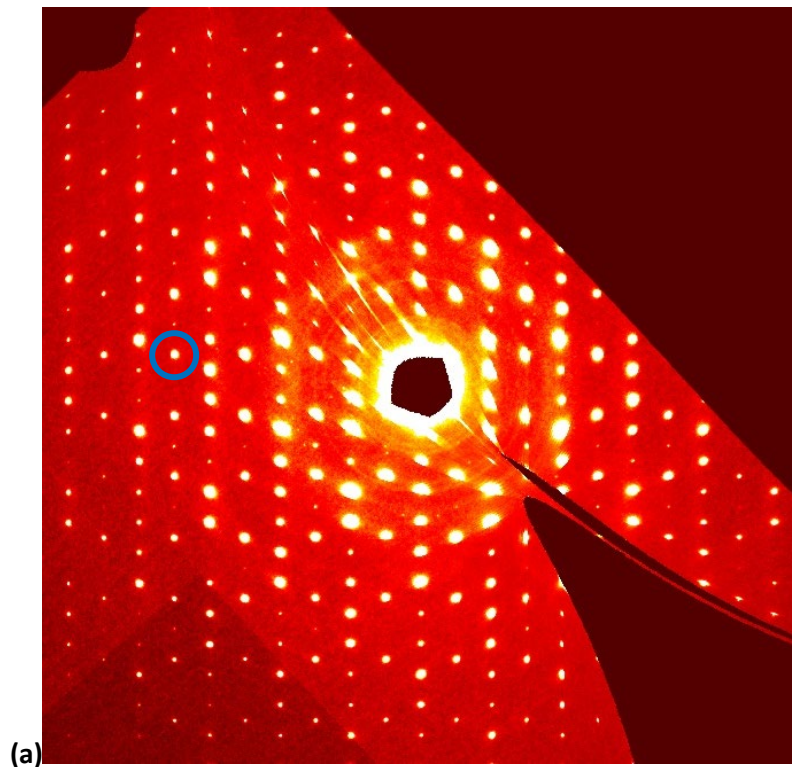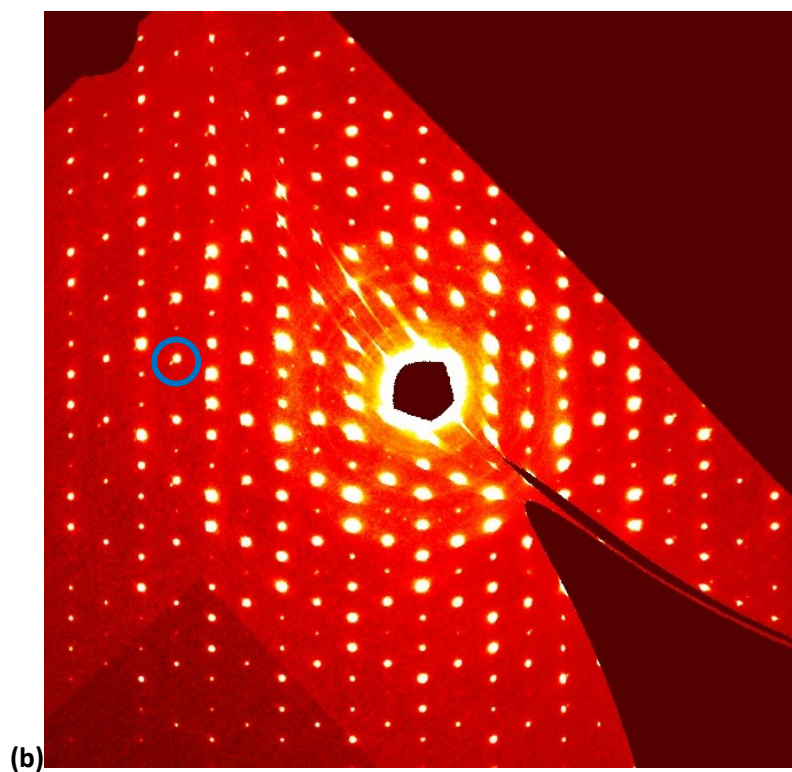

**Fig. SI-3.** (a) Tetragonal ( $h -1 l$ ) precession images from high-resolution single crystal x-ray diffraction at (a) 773 K and (b) 673 K. These were collected during cooling from 1273 K after cycling the crystal  $300 \rightarrow 873 \rightarrow 300 \rightarrow 1273$  K. The emergence of additional peaks on cooling from 773 to 673 K, e.g. in circled region, demonstrates the reversibility of the reported microstructural effects.

**Table SI-1. Anisotropic thermal U-parameters ( $\text{\AA}^2$ ) for the O sites in  $\text{V}_2\text{OPO}_4$  from 673 to 973 K from NPD refinements.**

|       | U11        | U22        | U33        | U12     | U13     | U23        | Ueq        |
|-------|------------|------------|------------|---------|---------|------------|------------|
| 673 K |            |            |            |         |         |            |            |
| O1    | 0.0197(11) | 0.0235(11) | 0.0313(10) | 0.00000 | 0.00000 | -0.0085(8) | 0.0248(11) |
| O2    | 0.0249(14) | 0.0249(14) | 0.022(2)   | 0.00000 | 0.00000 | 0.00000    | 0.0238(17) |
| 773 K |            |            |            |         |         |            |            |
| O1    | 0.0204(10) | 0.0262(11) | 0.0324(9)  | 0.00000 | 0.00000 | -0.0106(7) | 0.0263(10) |
| O2    | 0.0318(14) | 0.0318(14) | 0.019(2)   | 0.00000 | 0.00000 | 0.00000    | 0.0274(16) |
| 873 K |            |            |            |         |         |            |            |
| O1    | 0.0223(10) | 0.0280(11) | 0.0346(9)  | 0.00000 | 0.00000 | -0.0113(7) | 0.0283(10) |
| O2    | 0.0329(14) | 0.0329(14) | 0.019(2)   | 0.00000 | 0.00000 | 0.00000    | 0.0284(16) |
| 973 K |            |            |            |         |         |            |            |
| O1    | 0.0242(11) | 0.0302(11) | 0.0373(10) | 0.00000 | 0.00000 | -0.0123(8) | 0.0305(10) |
| O2    | 0.0333(14) | 0.0333(14) | 0.022(2)   | 0.00000 | 0.00000 | 0.00000    | 0.0295(17) |
